# Supplementary material for: Streaming algorithms for identification of pathogens and antibiotic resistance potential from real-time MinIONTM sequencing
Source: PubMed Central journal article supplement (PMC4960868; doi:10.1186/s13742-016-0137-2), 2016-07-26

(a) *K. pneumoniae* ATCC BAA-2146 (b) *K. quasipneumoniae* ATCC 700603

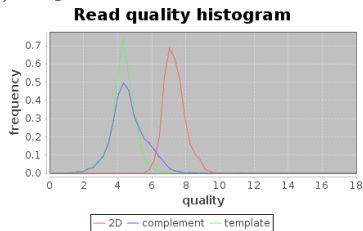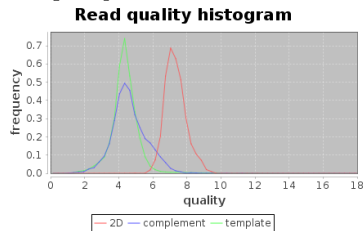

(c) *K. pneumoniae* ATCC 13883

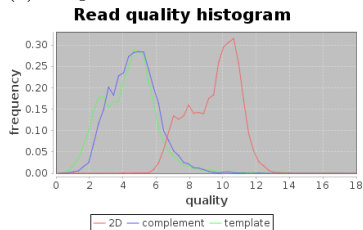

(d) Mixture sample

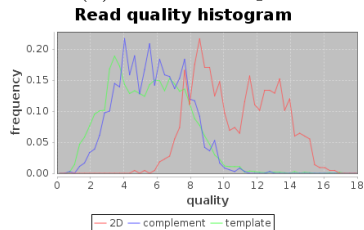

(e) *K. pneumoniae* ATCC BAA-2146 (f) *K. quasipneumoniae* ATCC 700603

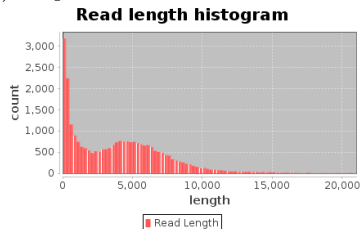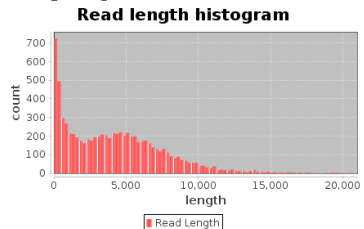

(g) *K. pneumoniae* ATCC 13883

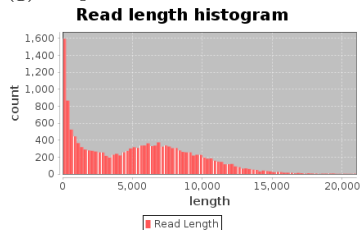

(h) Mixture sample

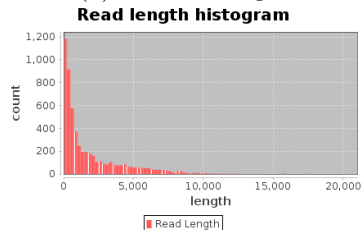

Supplement: 13742_2016_137_MOESM1_ESM.pdf [file 13742_2016_137_MOESM1_ESM.pdf]
